# Supplementary material
Source: Springer Nature journal article supplement (https://www.springermedizin.de/resource/supplementary/12884_2007_48_MOESM3_ESM.pdf/9459822)

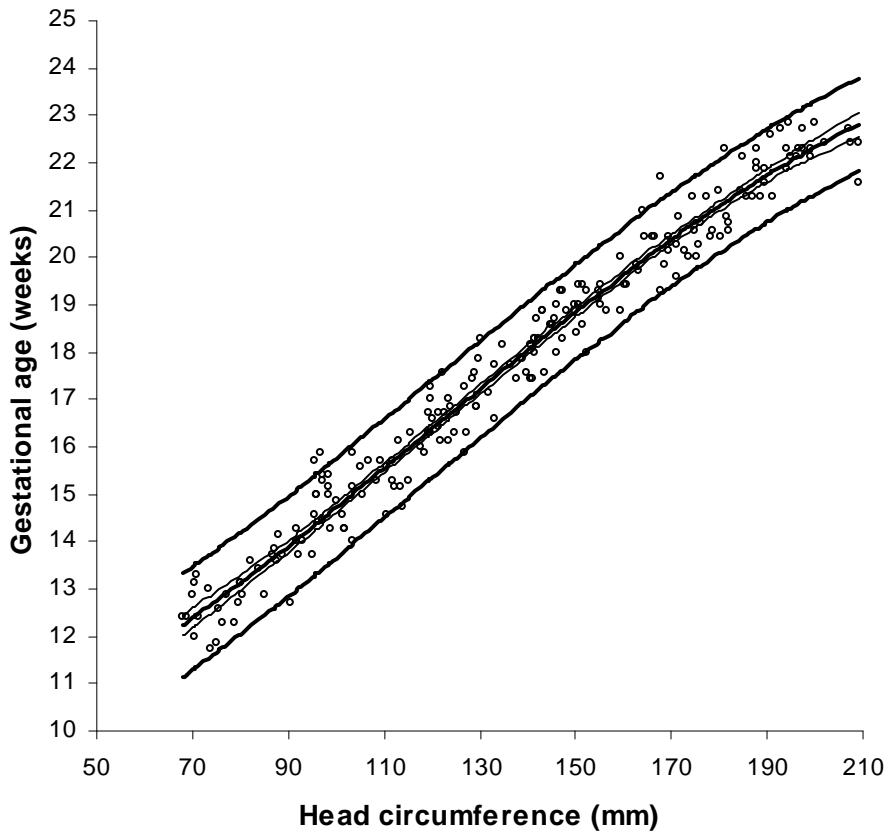

Supplement: MOESM3 [file 9459822]
